# Supplementary material
Source: Springer Nature journal article supplement (https://www.springermedizin.de/resource/supplementary/12889_2009_2343_MOESM1_ESM.pdf/9485458)
Supplement: MOESM1 [file 9485458]

## CONTROL GROUP

Women approached at first home visit  
n=299

Excluded because partner not willing/able to participate n=19.  
Partner

- too busy n=2
- not interested n=12
- unpredictable work hours/shift work n=3
- overseas n = 2

Eligible couples n=280

Excluded n=70

- Family relocating n=3
- Too busy n=10
- Doesn't like surveys n=2
- Nurse error/did not ask n=4
- Health problems n=3
- Participant in other research n=1
- Not interested n=3
- Twins n = 1
- No reason recorded n=44

Couples recruited (Interview 1 completed)  
n=210/280 (75%)

Withdrew or lost to follow-up  
n=14 women

Interview at 6 months postpartum  
n=196 women (93%)

1<sup>st</sup> interview n=210 women  
2<sup>nd</sup> interview n=196 women  
Missing data n=7  
**Analysed** n=189

## INTERVENTION GROUP

Women approached at first home visit  
n=408

Excluded because partner not willing/able to participate n=42  
Partner

- too busy n=4
- not interested n=21
- unpredictable work hours/shift work n=2
- interstate/overseas n=2
- not needed because already experienced parenting n=2
- not available (work/sport) n=11

Eligible couples n=366

Excluded n=177

- Family relocating n=4
- Too busy n=14
- Doesn't like surveys n=5
- Nurse error/did not ask n=3
- Health problems n=3
- Participant in other research n=3
- Not interested n=18
- Twins n=4
- Already well supported n=3
- Cannot attend intervention n=9
- No reason recorded n=111

Couples recruited (Interview 1 completed)  
n=189/366 (52%)

Attended seminar: n =120 (64%) women  
Materials mailed: n = 69 (37%) women

Withdrew or lost to follow-up  
n=21 women

Interview at 6 months postpartum  
n=168 women (89%)

1<sup>st</sup> interview n=189 women  
2<sup>nd</sup> interview n=168 women  
Missing data n=11  
**Analysed** n=157
